# Differences in gait stability and acceleration characteristics between healthy young and older females

1 Yuge Zhang<sup>1</sup>, Xinglong Zhou<sup>2</sup>, Mirjam Pijnappels<sup>1</sup>, Sjoerd M. Bruijn<sup>1,2,4\*</sup>

2 <sup>1</sup>Department of Human Movement Sciences, Faculty of Behavioural and Movement Sciences,  
3 Vrije Universiteit Amsterdam, Amsterdam, The Netherlands

4 <sup>2</sup>Department of Sports Human Science, Beijing Sport University, Beijing, PR China

5 <sup>3</sup>Institute of Brain and Behavior Amsterdam, Amsterdam, The Netherlands

6 <sup>4</sup>Biomechanics Laboratory, Fujian Medical University, Quanzhou, Fujian, PR China

7 \* **Corresponding:**

8 Sjoerd M. Bruijn

9 s.m.bruijn@gmail.com

## 10 **Abstract**

11 Our aim was to evaluate differences in gait acceleration intensity, variability and stability of feet  
12 and trunk between older females and young females using inertial sensors. Twenty older females  
13 (OF; mean age 68.4, SD 4.1 years) and eighteen young females (YF; mean age 22.3, SD 1.7 years)  
14 were asked to walk straight for 100 meters at their preferred speed, while wearing inertial sensors  
15 on heels and lower back. We calculated spatiotemporal measures, foot and trunk acceleration  
16 characteristics and their variability, as well as trunk stability using the local divergence exponent  
17 (LDE). Two-way analysis of variance (including the factors foot and age), Student's t-test, and  
18 Mann–Whitney U test were used to compare statistical differences of measures between groups.  
19 Cohen's d effects were calculated for each variable. Foot maximum vertical acceleration and  
20 amplitude, trunk-foot vertical acceleration attenuation, as well as their variability were  
21 significantly smaller in OF than in YF. In contrast, trunk mediolateral acceleration amplitude,  
22 maximum vertical acceleration, and amplitude, as well as their variability were significantly  
23 larger in OF than in YF. Moreover, OF showed lower stability (i.e., higher LDE values) in  
24 mediolateral acceleration, mediolateral and vertical angular velocity of the trunk. Even though we  
25 measured healthy older females, these participants showed lower vertical foot accelerations with  
26 higher vertical trunk acceleration, lower trunk-foot vertical acceleration attenuation, less gait  
27 stability, and more variability of the trunk, and hence, were more likely to fall. These findings  
28 suggest that instrumented gait measurements may help for early detection of changes or  
29 impairments in gait performance, even before this can be observed by clinical eye or gait speed.

30

31 **Keywords: walking, aging, wearable system, motor control, balance**

## 32 1 Introduction

33 Falls among older adults are the leading indirect cause of disability and death (Tang et al., 2017).  
34 Epidemiological studies have shown that the 30% of people aged 65 years and older fall, with an  
35 increase in incidence to 40% in people over 80 years (Weber et al., 2018). This is due to poorer  
36 physiological function and control of stability with ageing (Winter, 1995). In China, 53% of falls  
37 occur while walking (Xia et al., 2010), and hence, it is particularly important to pay attention to  
38 gait performance of older adults for early identification of stability problems to prevent falls.  
39 Moreover, many studies have shown that among people over 60 years, females were more likely  
40 to fall (Tinetti et al., 1988; Daley and Spinks, 2000; De Rekeneire et al., 2003), as about 65% of  
41 women and 44% of men fell in their usual place of residence (Masud and Morris, 2001).  
42 Therefore, we focused on gait stability of females in our study.

43 There are several ways to evaluate gait, such as clinical function tests, questionnaires and  
44 measurements in a biomechanics laboratory (Hamacher et al., 2011). Questionnaires and clinical  
45 tests cannot reflect gait performance outside the laboratory, and sometimes have poor objectivity  
46 (van Schooten et al., 2015a). Gait assessment in a biomechanical laboratory has the advantage of  
47 capturing whole body kinematics which is accurate but also costly, time-consuming and limited to  
48 space and time (Terrier and Deriaz, 2011). Nowadays, the feasibility of inertial sensor to quantify  
49 the whole-body gait kinematics has been demonstrated (Tao et al., 2012), and it can be used to  
50 collect gait data in people's own environment by a single sensor on either the trunk or foot (Zhu  
51 et al., 2012; Weiss et al., 2013).

52 Gait stability reflects the ability to keep walking in the face of perturbations (Pai and Bhatt,  
53 2007; Bruijn et al., 2013). Dynamical systems and non-linear time series analysis can be used to  
54 evaluate gait stability by quantifying the complex and chaotic characteristics of the human body  
55 (Bressel, 2004). One of these measures, the local divergence exponent (LDE) has been shown to  
56 have good reliability and validity (England and Granata, 2007; Son et al., 2009; Hu et al., 2012).  
57 The LDE quantifies the average exponential rate of divergence of neighboring trajectories in state  
58 space, and provides a direct measure of the sensitivity of a system to small perturbations  
59 (Dingwell and Marin, 2006).

60 Internal perturbations of the human body cause variability and randomness in gait (Zhang et al.,  
61 2011). If gait is within a stable range, people would not need to correct this variability.  
62 Increased variability likely reflects a less automatic gait pattern, instability and increased  
63 susceptibility to falls (Weiss et al., 2013). Studies also confirmed that variability in some gait  
64 characteristics (such as stride length, stride width, stride time) is highly related to the risk of  
65 falling (O'Loughlin et al., 1994; Chau et al., 2005). However, some studies suggested that  
66 variability is not equal to stability, as the level of variability was not necessarily negatively related  
67 to the level of stability (Li et al., 2005; van Emmerik et al., 2016).

68 As the control of stability in gait declines with ageing, we aimed to use inertial sensors to  
69 assess differences in gait stability and variability between healthy young and older females. In  
70 doing so, we focused on data obtained from trunk as well as foot sensors and calculated  
71 acceleration intensity, stability, and variability measures. We hypothesized that older females  
72 have a lower gait stability and increase variability on trunk accelerations compared with younger  
73 females.

## 74 2 Materials and Method

### 75 2.1 Participants

76 A total of 20 healthy older females (OF) and 18 younger females (YF) were recruited from the  
77 campus of Beijing Sport university, China (Table 1). None of our participants had any orthopedic  
78 or neurological disorders, acute pain or other complaints that might have affected gait and they  
79 were all able to walk independently without a walking aid. All participants were informed about  
80 the research procedures and the protocol was approved by the Ethics Committee of Sports  
81 Science Experiment of Beijing Sport University (approval number: 2021010H).

### 82 2.2 Data Acquisition

83 Participants wore three inertial sensors (Xsens MTw Awinda, the Netherland) on heels and on the  
84 lumbar region of the trunk, using the supplied elastic belt. These sensors had a sample rate of 100  
85 samples/s and a range of  $-160 \text{ m/s}^2$  and  $+160 \text{ m/s}^2$ . Data collection was synchronized between  
86 sensors. All participants wore the same model of shoes. They were asked to walk 100 meters on a  
87 straight running track at a self-selected speed, since gait variability is expected minimal at this  
88 speed for healthy people (Hausdorff et al., 1997). In addition, although clinical gait tests are  
89 usually 4 or 10 meters, these tests do not represent daily-life gait very well (Van Ancum et al.,  
90 2019). Therefore, 100 meters used in this study can reflect well the natural gait at a comfortable  
91 speed without participants being exhausted.

### 92 2.3 Gait Measures

93 MATLAB (R2019b, MathWorks Inc, Natick, MA, USA) was used to analyze data without the  
94 first and last steps. Each gait cycle was identified from the sagittal plane angular velocity of foot  
95 sensors with three gait events: heel-strike ( $T_{\text{heel\_strike}}$ ), toe-off ( $T_{\text{toe\_off}}$ ) and foot-flat ( $T_{\text{foot\_flat}}$ )  
96 (Mariani et al., 2010). Stride time was defined as the duration between two consecutive  $T_{\text{heel\_strike}}$ .  
97 Combined with the gait events of both feet, we got the initial double support period (IDS) and the  
98 terminal double support period (TDS).

99 For the trunk sensor, sensor data were realigned to a coordinate system based on the  
100 accelerometer's orientation with respect to gravity (vertical axis) and optimization of left-right  
101 symmetry (mediolateral axis) (Rispen et al., 2015; Van Schooten et al., 2015b).

102 For the foot sensors, initial displacements were calculated by integrating linear accelerations  
103 twicer for each gait cycle (in the global coordinate system), using zero-velocity-update method to  
104 eliminate drift, assuming linearity of the drift (Skog et al., 2010). The hence obtained direction of  
105 displacement was not necessary along the x or y axis of the global coordinate system. To obtain  
106 meaningful stride lengths, we thus rotated the obtained positions, the acceleration and angular  
107 velocity of the feet to a coordinate system that was aligned with the direction of walking (i.e., end  
108 position minus starting position), with the vertical axis being vertical. Then, walking speed was  
109 obtained by dividing the distance of the walking direction by the time.

110 For acceleration measures, maximum vertical acceleration of feet and trunk were calculated  
111 to reflect the intensity of ground contact (Gill and O'Connor, 2003). It has been suggested that  
112 people stabilize their head during walking (Kavanagh et al., 2006). Although the trunk segment  
113 plays a key role in damping gait-related oscillations (Kavanagh et al., 2006), the damping of

114 oscillations by the trunk in the vertical direction has been suggested to be minor (Prince et al.,  
115 1994;Kavanagh et al., 2004). Hence, such accelerations must be attenuated by the lower limbs.  
116 Thus, we calculated trunk-foot vertical acceleration attenuation was used in our study, which was  
117 calculated by the difference in maximum vertical acceleration between trunk and foot, which  
118 represents the impact absorption of the lower limbs. Acceleration amplitude (in the coordinate  
119 system prescribed by the walking direction, see above) for each direction (anteroposterior  
120 direction (AP), mediolateral (ML) and vertical (VT)) was calculated as the range of acceleration  
121 in a gait cycle.

122 For above measures of each person, after getting the mean and standard deviation (SD) over  
123 all cycles (see Table 2, Table3), we obtained coefficient of variation (CV) by dividing the  
124 standard deviation by the mean (Kavanagh and Menz, 2008) (see Supplementary Table 1).

125 We calculated the LDE of acceleration and angular velocity of each dimension separately (in  
126 the coordinate system prescribed by the walking direction, see above). The time series of 50 gait  
127 cycles was normalized into 5000 samples, with the average of 100 samples per cycle. From these  
128 data, state spaces were reconstructed using the method of correlation integral (C-C method),  
129 which not only can determine both embedding dimension and delay time, but also has a good  
130 robustness to the noise in small amount of data (Kim et al., 1999) (see Supplementary Tables 2  
131 and 3 for dimension and delay values). LDE was expressed as the mean logarithmic rate of  
132 divergence per stride using Rosenstein's method (Rosenstein et al., 1993). Higher values of the  
133 LDE indicate a lower local stability.

## 134 **2.4 Statistical Analysis**

135 Normality was assessed using the Kolmogorov–Smirnov test. For measures of the left and right  
136 feet, differences were tested using two-way ANOVAs, with within-subject factor Foot (left and  
137 right) and between-subject factor Group (YF and OF). For other measures, we used Student's  
138 t-tests to compare between age groups. For LDE, which appeared not distributed normally, we  
139 compared between groups using the Mann–Whitney U test. For all measures,  $p < 0.05$  was  
140 considered as a significant effect. Cohen's  $d$  effects were calculated for each variable as the  
141 difference between group means divided by the group pooled standard deviation. Magnitudes of  $d$   
142 = 0.01, 0.20, 0.50, 0.80, 1.20 and 2.0 were considered very small, small, medium, large, very  
143 large and huge, separately (Sawilowsky, 2009;Charach et al., 2011;Cohen, 2013).

## 144 **3 Results**

145 Descriptive characteristics of the participants are summarized in Table 1. OF were significantly  
146 older, shorter and had a higher weight and higher BMI than YF. The mean age of OF and YF was  
147 68.4 and 22.3, respectively.

148 Table 2 shows the mean values for all measures. We found no interaction between Foot and  
149 Group for any of the outcome measures, and no significant effect of Foot. Hence, all variables  
150 that were calculated for both feet are displayed as averages over both feet. OF had higher  
151 maximum vertical acceleration of the trunk than YF, with medium effect size (0.75), but smaller  
152 maximum vertical acceleration of the feet than YF, with very large effect size (1.34). As a result,  
153 OF had significantly smaller trunk-foot vertical acceleration attenuation, with a very large effect  
154 size of 1.8. In addition, OF's vertical accelerations amplitude of the feet were significantly

155 smaller than YF, with medium effect size (-0.59). For the trunk, OF's ML and VT acceleration  
156 amplitude were significantly larger than YF, and the effect size of the latter was largest (0.76).  
157 The LDE of trunk from ML acceleration, and from ML and VT angular velocity were  
158 significantly larger (less stable) for OF than for YF, with large (1.01), very large (1.48) and  
159 medium effect size (0.66), respectively.

160 Table 3 shows the variability of all measures. No significant difference in variability of  
161 spatial-temporal gait measures were found between groups. The variability of maximum vertical  
162 acceleration of the feet was significantly smaller for OF than YF, and its effect size was 1.70.  
163 While for trunk, the variability of the maximum vertical acceleration was significantly larger for  
164 the OF (medium effect size 0.72). The variability of trunk-foot vertical acceleration attenuation  
165 was smaller in OF than in YF, (effect size very large, 1.87). OF had significantly smaller  
166 variability of acceleration amplitude of the feet in three directions than YF, with huge effect size  
167 in ML direction (2.53) and a large effect size in the VT direction (1.01). For the trunk, OF's  
168 variability of acceleration amplitude was significantly larger than YF in ML and VT direction,  
169 with effect sizes of 0.41 and 0.86, respectively. The CV of gait measures showed largely the same  
170 pattern as the SD (see Supplementary Table 1).

## 171 **4 Discussion**

### 172 **4.1 Mean gait measures**

173 In this study, we used inertial sensors to evaluate differences in acceleration intensity, variability  
174 and stability of feet and trunk during gait between healthy young and older females. Although  
175 older adults generally were suggested to walk slower due to physical limitations like muscle  
176 weakness or loss of flexibility (Hamacher et al., 2014), the OF in our study walked at similar  
177 preferred speed and stride length as the YF.

178 We found a reduction in foot vertical maximum acceleration in OF, which probably reflected  
179 a reduction of peak ground reaction forces. Such a reduction of ground reaction forces could  
180 result from a crouch-like gait, which has been shown in young adults to lead to a reduction of the  
181 peak ground reaction force (Li et al., 1996;Grasso et al., 2000). Such a crouch like gait may  
182 increase the metabolic cost of locomotion in the elderly (Carey and Crompton, 2005). Although  
183 the trunk segment plays a key role in damping gait-related oscillations (Kavanagh et al., 2006),  
184 the damping of oscillations by the trunk in the vertical direction has been suggested to be minor  
185 (Prince et al., 1994;Kavanagh et al., 2004). In our study, we found a lower trunk-foot vertical  
186 acceleration attenuation and a higher trunk acceleration amplitude in OF, which implies a  
187 decreased cushioning (impact absorption) and hence less preservation of the head's stability  
188 (Menz et al., 2003). Even though foot (vertical) accelerations were lower in OF, suggesting less  
189 impact, the OF were not able to attenuate the higher accelerations in the trunk. This reduction in  
190 impact absorption may be caused by age-related neuromuscular changes, such a reduced muscle  
191 strength of the triceps surae and quadriceps femoris(Reeves et al., 2006), degraded stiffness and  
192 elastic modulus of the tendons(McCrum et al., 2018), muscle co-contraction and degraded  
193 absorption of the intervertebral disc(Brzuszkiewicz-Kuźmicka et al., 2018). Considering that  
194 two-thirds of the weight of the human body is in the upper body, such higher trunk accelerations  
195 may be destabilizing, which may cause falls (Woollacott and Tang, 1997).



196 For stability, LDE calculated from trunk time-series data have been shown to better reflect  
197 differences in gait stability due to age than LDE calculated from data of other segments (Punt et  
198 al., 2015). In our study, OF showed significantly lower local dynamic stability (higher LDE) in  
199 ML acceleration, ML and VT angular velocity. Among these, the LDE calculated from trunk ML  
200 angular velocity had the largest effect size. As stability in the ML direction needs more control  
201 than stability in the AP direction during gait (Bruijn et al., 2009; O'Connor and Kuo, 2009),  
202 decreased LDE of trunk angular velocity in ML direction could be an early indicator of gait  
203 stability problems.

## 204 **4.2 Variability measures**

205 All participants in this study walked under the same environmental conditions. Thus, any  
206 between-subject differences in variability arose from differences in (internal) neuromotor noise  
207 and not (external) environmental noise. No differences were found in the variability of  
208 spatiotemporal measures, which was consistent with a previous study showing that temporal gait  
209 variability of older non-fallers was not significantly different from young adults in terms of  
210 standard deviation and coefficient of variation (Hausdorff et al., 1997).

211 Our OF walked with similar variability of maximum vertical acceleration of feet variability  
212 compared to YF (Table 3 and Supplementary Table 4). However, the variability of ML and VT  
213 acceleration amplitude of the trunk was larger for the OF, which could suggest OF are at a higher  
214 risk of balance loss and falling (Kavanagh and Menz, 2008).

215 All in all, our findings suggests that stability of the trunk might be a more sensitive indicator  
216 of locomotor impairment and potential future risk of falls than changes in variability of the trunk,  
217 as the LDE had higher effect sizes (Kang and Dingwell, 2008). Measures of variability of  
218 acceleration of the feet showed even higher effect sizes and might thus be even more useful.  
219 However, here, it should be noted that these effects were opposite from theoretically expected,  
220 with the OF having lower (means and variability) acceleration of the foot.

## 221 **4.3 Limitations**

222 All tests in our study were aimed at testing the same hypothesis, that is, OF are less stable and  
223 more variable than YF, hence, we did not use a correction for multiple testing. Nonetheless, not  
224 correcting may lead to Type I errors, and thus, some caution is warranted. Furthermore, the older  
225 participants in our study were quite fit and additional studies are needed to further investigate the  
226 applicability of acceleration attenuation when studying older adults. Future research can expand  
227 the sample size and conduct a multi-center study to obtain more representative results. Although  
228 we used only trunk and feet sensors for practical usefulness, the underlying mechanisms for the  
229 alterations in gait in the older women remain unclear and would require more detailed  
230 assessments of e.g. whole body kinematics and muscle activity.

231

## 232 5 Conclusions

233 Although healthy older females had similar walking speed and spatiotemporal parameters as  
234 young females during steady state walking, they showed lower vertical foot accelerations and  
235 higher vertical trunk accelerations, suggesting less impact, and less absorption of the impact. In  
236 addition, lower gait stability and higher variability of trunk movements for older females also  
237 indicated they were more likely to fall. The measures derived from the accelerations of the trunk  
238 were sensitive to reflect the gait instability as expected, especially trunk-foot vertical acceleration  
239 attenuation and its variability. While the variability of foot acceleration amplitudes was also  
240 sensitive to age, these differences were opposite from expected, making it harder to draw any  
241 conclusion as to their usefulness for fall prediction. These findings suggest that instrumented gait  
242 measurements may help for early detection of changes or impairments in gait performance, even  
243 before this can be observed by clinical eye or gait speed.

## 244 6 Conflicts of Interest

245 The authors declare no conflict of interest.

## 246 7 Author Contributions

247 **Yuge Zhang:** Methodology, Software, Formal analysis, Investigation, Data curation,  
248 Writing-Original Draft, Writing-Review and Editing, Visualization. **Xinglong Zhou:**  
249 Conceptualization, Resources. **Mirjam Pijnappels:** Formal analysis, Writing review and Editing,  
250 Supervision, Funding acquisition. **Sjoerd M. Bruijn:** Methodology, Software, Formal analysis,  
251 Writing- Review and Editing, Supervision, Funding acquisition. All authors have read and agreed  
252 to the published version of the manuscript.

## 253 8 Acknowledgments

254 YZ was funded by a CSC Scholarship Council (CSC) fellowship (202009110145). MP funded by  
255 a VIDI Grant (no. 91714344) from the Dutch Organization for Scientific Research (NWO). SMB  
256 was funded by a VIDI grant (016.Vidi.178.014) from the Dutch Organization for Scientific  
257 Research (NWO).

## 258 9 References

- 259 Bressel, E. (2004). Innovative Analyses of Human Movement: Analytical Tools for Human  
260 Movement Research. *Medicine & Science in Sports & Exercise* 36, 1834.
- 261 Bruijn, S.M., Meijer, O., Beek, P., and Van Dieën, J.H. (2013). Assessing the stability of human  
262 locomotion: a review of current measures. *Journal of the Royal Society Interface* 10,  
263 20120999.
- 264 Bruijn, S.M., Van Dieën, J.H., Meijer, O.G., and Beek, P.J. (2009). Is slow walking more stable?  
265 *Journal of biomechanics* 42, 1506-1512.
- 266 Brzuskiewicz-Kuźmicka, G., Szczegieliński, J., and Bączkiewicz, D. (2018). Age-related changes  
267 in shock absorption capacity of the human spinal column. *Clinical interventions in aging*  
268 13, 987.

- 269 Carey, T.S., and Crompton, R.H. (2005). The metabolic costs of ‘bent-hip, bent-knee’ walking in  
270 humans. *Journal of Human Evolution* 48, 25-44.
- 271 Charach, A., Dashti, B., Carson, P., Booker, L., Lim, C.G., Lillie, E., Yeung, E., Ma, J., Raina, P.,  
272 and Schachar, R. (2011). Attention deficit hyperactivity disorder: effectiveness of  
273 treatment in at-risk preschoolers; long-term effectiveness in all ages; and variability in  
274 prevalence, diagnosis, and treatment.
- 275 Chau, T., Young, S., and Redekop, S. (2005). Managing variability in the summary and  
276 comparison of gait data. *Journal of neuroengineering and rehabilitation* 2, 22.
- 277 Cohen, J. (2013). *Statistical power analysis for the behavioral sciences*. Academic press.
- 278 Daley, M.J., and Spinks, W.L. (2000). Exercise, mobility and aging. *Sports medicine* 29, 1-12.
- 279 De Rekeneire, N., Visser, M., Peila, R., Nevitt, M.C., Cauley, J.A., Tylavsky, F.A., Simonsick,  
280 E.M., and Harris, T.B. (2003). Is a fall just a fall: correlates of falling in healthy older  
281 persons. The Health, Aging and Body Composition Study. *Journal of the American*  
282 *Geriatrics Society* 51, 841-846.
- 283 Dingwell, J.B., and Marin, L.C. (2006). Kinematic variability and local dynamic stability of upper  
284 body motions when walking at different speeds. *Journal of biomechanics* 39, 444-452.
- 285 England, S.A., and Granata, K.P. (2007). The influence of gait speed on local dynamic stability of  
286 walking. *Gait & posture* 25, 172-178.
- 287 Gill, H., and O’connor, J. (2003). Heelstrike and the pathomechanics of osteoarthritis: a pilot gait  
288 study. *Journal of biomechanics* 36, 1625-1631.
- 289 Grasso, R., Zago, M., and Lacquaniti, F. (2000). Interactions between posture and locomotion:  
290 motor patterns in humans walking with bent posture versus erect posture. *Journal of*  
291 *Neurophysiology* 83, 288-300.
- 292 Hamacher, D., Hamacher, D., and Schega, L. (2014). Towards the importance of minimum toe  
293 clearance in level ground walking in a healthy elderly population. *Gait & posture* 40,  
294 727-729.
- 295 Hamacher, D., Singh, N., Van Dieën, J.H., Heller, M., and Taylor, W.R. (2011). Kinematic  
296 measures for assessing gait stability in elderly individuals: a systematic review. *Journal of*  
297 *The Royal Society Interface* 8, 1682-1698.
- 298 Hausdorff, J.M., Edelberg, H.K., Mitchell, S.L., Goldberger, A.L., and Wei, J.Y. (1997).  
299 Increased gait unsteadiness in community-dwelling elderly fallers. *Archives of physical*  
300 *medicine and rehabilitation* 78, 278-283.
- 301 Hu, F., Gu, D., Dai, K., An, B., Chen, J., and Wu, Y. (2012). Nonlinear time series analysis of  
302 gait stability during walking. *Journal of Medical Biomechanics* 27, 51-57.
- 303 Kang, H.G., and Dingwell, J.B. (2008). Effects of walking speed, strength and range of motion on  
304 gait stability in healthy older adults. *Journal of biomechanics* 41, 2899-2905.
- 305 Kavanagh, J., Barrett, R., and Morrison, S. (2006). The role of the neck and trunk in facilitating  
306 head stability during walking. *Experimental brain research* 172, 454.
- 307 Kavanagh, J.J., Barrett, R.S., and Morrison, S. (2004). Upper body accelerations during walking  
308 in healthy young and elderly men. *Gait & Posture* 20, 291-298.
- 309 Kavanagh, J.J., and Menz, H.B. (2008). Accelerometry: a technique for quantifying movement  
310 patterns during walking. *Gait & posture* 28, 1-15.
- 311 Kim, H.S., Eykholt, R., and Salas, J. (1999). Nonlinear dynamics, delay times, and embedding  
312 windows. *Physica D: Nonlinear Phenomena* 127, 48-60.



- 313 Li, L., Haddad, J.M., and Hamill, J. (2005). Stability and variability may respond differently to  
314 changes in walking speed. *Human movement science* 24, 257-267.
- 315 Li, Y., Crompton, R., Alexander, R.M., Günther, M., and Wang, W. (1996). Characteristics of  
316 ground reaction forces in normal and chimpanzee-like bipedal walking by humans. *Folia*  
317 *Primatologica* 66, 137-159.
- 318 Mariani, B., Hoskovec, C., Rochat, S., Bula, C., Penders, J., and Aminian, K. (2010). 3D gait  
319 assessment in young and elderly subjects using foot-worn inertial sensors. *J Biomech* 43,  
320 2999-3006.
- 321 Masud, T., and Morris, R.O. (2001). Epidemiology of falls. *Age and ageing* 30, 3-7.
- 322 Mccrum, C., Leow, P., Epro, G., König, M., Meijer, K., and Karamanidis, K. (2018). Alterations  
323 in leg extensor muscle-tendon unit biomechanical properties with ageing and mechanical  
324 loading. *Frontiers in physiology* 9, 150.
- 325 Menz, H.B., Lord, S.R., and Fitzpatrick, R.C. (2003). Acceleration patterns of the head and pelvis  
326 when walking on level and irregular surfaces. *Gait & posture* 18, 35-46.
- 327 O'connor, S.M., and Kuo, A.D. (2009). Direction-dependent control of balance during walking  
328 and standing. *Journal of neurophysiology* 102, 1411-1419.
- 329 O'loughlin, J.L., Boivin, J.-F., Robitaille, Y., and Suissa, S. (1994). Falls among the elderly:  
330 distinguishing indoor and outdoor risk factors in Canada. *Journal of epidemiology and*  
331 *community health* 48, 488.
- 332 Pai, Y.-C., and Bhatt, T.S. (2007). Repeated-slip training: an emerging paradigm for prevention of  
333 slip-related falls among older adults. *Physical therapy* 87, 1478-1491.
- 334 Prince, F., Winter, D.A., Stergiou, P., and Walt, S.E. (1994). Anticipatory control of upper body  
335 balance during human locomotion. *Gait & Posture* 2, 19-25.
- 336 Punt, M., Bruijn, S.M., Wittink, H., and Van Dieën, J.H. (2015). Effect of arm swing strategy on  
337 local dynamic stability of human gait. *Gait & posture* 41, 504-509.
- 338 Reeves, N.D., Narici, M.V., and Maganaris, C.N. (2006). Myotendinous plasticity to ageing and  
339 resistance exercise in humans. *Experimental physiology* 91, 483-498.
- 340 Rispens, S.M., Van Schooten, K.S., Pijnappels, M., Daffertshofer, A., Beek, P.J., and Van Dieën,  
341 J.H. (2015). Identification of fall risk predictors in daily life measurements: gait  
342 characteristics' reliability and association with self-reported fall history.  
343 *Neurorehabilitation and Neural Repair* 29, 54-61.
- 344 Rosenstein, M.T., Collins, J.J., and De Luca, C.J. (1993). A practical method for calculating  
345 largest Lyapunov exponents from small data sets. *Physica D: Nonlinear Phenomena* 65,  
346 117-134.
- 347 Sawilowsky, S.S. (2009). New effect size rules of thumb. *Journal of modern applied statistical*  
348 *methods* 8, 26.
- 349 Skog, I., Handel, P., Nilsson, J.-O., and Rantakokko, J. (2010). Zero-velocity detection—An  
350 algorithm evaluation. *IEEE transactions on biomedical engineering* 57, 2657-2666.
- 351 Son, K., Park, J., and Park, S. (2009). Variability analysis of lower extremity joint kinematics  
352 during walking in healthy young adults. *Medical engineering & physics* 31, 784-792.
- 353 Tang, Y., Guo, X., Qiao, Z., and Qiu, P. (2017). Analysis on prevalence and risk factors for falls  
354 among the elderly in communities of Beijing and Shanghai. *Chinese Journal of disease*  
355 *control & prevention* 21, 72-76.

- 356 Tao, W., Liu, T., Zheng, R., and Feng, H. (2012). Gait analysis using wearable sensors. *Sensors*  
357 12, 2255-2283.
- 358 Terrier, P., and Deriaz, O. (2011). Kinematic variability, fractal dynamics and local dynamic  
359 stability of treadmill walking. *Journal of Neuroengineering and Rehabilitation* 8, 12-12.
- 360 Tinetti, M.E., Speechley, M., and Ginter, S.F. (1988). Risk factors for falls among elderly persons  
361 living in the community. *New England journal of medicine* 319, 1701-1707.
- 362 Van Ancum, J.M., Van Schooten, K.S., Jonkman, N.H., Huijben, B., Van Lummel, R.C., Meskers,  
363 C.G., Maier, A.B., and Pijnappels, M. (2019). Gait speed assessed by a 4-m walk test is  
364 not representative of daily-life gait speed in community-dwelling adults. *Maturitas* 121,  
365 28-34.
- 366 Van Emmerik, R.E., Ducharme, S.W., Amado, A.C., and Hamill, J. (2016). Comparing dynamical  
367 systems concepts and techniques for biomechanical analysis. *Journal of Sport and Health*  
368 *Science* 5, 3-13.
- 369 Van Schooten, K.S., Pijnappels, M., Rispens, S.M., Elders, P.J., Lips, P., and Van Dieen, J.H.  
370 (2015a). Ambulatory fall-risk assessment: amount and quality of daily-life gait predict  
371 falls in older adults. *Journals of Gerontology Series A: Biomedical Sciences and Medical*  
372 *Sciences* 70, 608-615.
- 373 Van Schooten, K.S., Pijnappels, M., Rispens, S.M., Elders, P.J.M., Lips, P., and Van Dieen, J.H.  
374 (2015b). Ambulatory Fall-Risk Assessment: Amount and Quality of Daily-Life Gait  
375 Predict Falls in Older Adults. *Journals of Gerontology Series A-biological Sciences and*  
376 *Medical Sciences* 70, 608-615.
- 377 Weber, M., Van Ancum, J.M., Bergquist, R., Taraldsen, K., Gordt, K., Mikolaizak, A.S., Nerz, C.,  
378 Pijnappels, M., Jonkman, N.H., and Maier, A.B. (2018). Concurrent validity and  
379 reliability of the Community Balance and Mobility scale in young-older adults. *BMC*  
380 *Geriatrics* 18, 1-10.
- 381 Weiss, A., Brozgol, M., Dorfman, M., Herman, T., Shema, S., Giladi, N., and Hausdorff, J.M.  
382 (2013). Does the evaluation of gait quality during daily life provide insight into fall risk?  
383 A novel approach using 3-day accelerometer recordings. *Neurorehabilitation and neural*  
384 *repair* 27, 742-752.
- 385 Winter, D.A. (1995). Human balance and posture control during standing and walking. *Gait &*  
386 *posture* 3, 193-214.
- 387 Woollacott, M.H., and Tang, P.-F. (1997). Balance Control During Walking in the Older Adult:  
388 Research and Its Implications. *Physical Therapy* 77, 646-660.
- 389 Xia, Q., Jiang, Y., Tang, C., and Niu, C. (2010). Study on the epidemiologic characteristics and  
390 medical burden of falls among adults in community. *Chinese Journal of disease control &*  
391 *prevention* 14, 647-649.
- 392 Zhang, B., Jiang, S., Yan, K., Wei, D., and Smigorski, K. (2011). Human walking analysis,  
393 evaluation and classification based on motion capture system. *Heal. Manag.-Differ.*  
394 *Approaches Solut*, 361-398.
- 395 Zhu, S., Anderson, H., and Wang, Y. (Year). "A real-time on-chip algorithm for IMU-Based gait  
396 measurement", in: *Pacific-Rim Conference on Multimedia: Springer*, 93-104.

Differences in gait stability and acceleration characteristics between healthy young and older females

397 **10 Tables**

398

**Table 1.** Participant characteristics

399

400

401

402

403

404

405

406

| Groups                   | YF           | OF           | p-Value (T-test) |
|--------------------------|--------------|--------------|------------------|
| Age (years)              | 22.3 (1.7)   | 68.4 (4.1)   | <0.001***        |
| Height (m)               | 1.65 (0.04)  | 1.59 (0.05)  | <0.001***        |
| Body mass (kg)           | 54.66 (3.93) | 63.2 (7.95)  | <0.001***        |
| BMI (kg/m <sup>2</sup> ) | 20.19 (1.53) | 24.96 (2.60) | <0.001***        |
| Leg length (cm)          | 88.21 (3.53) | 87.28 (3.19) | 0.29             |

407

**Table 2.** Mean (and SD) of all gait measures

|                                                                       | OF           | YF           | p-value   | Effect size |
|-----------------------------------------------------------------------|--------------|--------------|-----------|-------------|
| <b>Spatial-temporal measures</b>                                      |              |              |           |             |
| Stride time (s)                                                       | 1.04 (0.07)  | 1.07(0.05)   | 0.06      | -0.69       |
| Initial double support period, IDS (%)                                | 14.30(1.70)  | 14.00(1.20)  | 0.50      | 0.00        |
| Terminal double support period, TDS (%)                               | 14.10(1.60)  | 14.30(1.40)  | 0.76      | 0.02        |
| Swing (%)                                                             | 35.80(1.70)  | 35.90(1.20)  | 0.78      | -0.01       |
| Velocity of feet (m/s)                                                | 1.35(0.17)   | 1.37(0.14)   | 0.88      | -0.06       |
| Stride length of feet (m)                                             | 1.28(0.11)   | 1.35(0.12)   | 0.06      | -0.61       |
| <b>VT Acceleration Maximum (m/s<sup>2</sup>)</b>                      |              |              |           |             |
| VT maximum acceleration of feet                                       | 24.81(4.32)  | 33.52(8.78)  | <0.001*** | -1.34       |
| VT maximum acceleration of trunk                                      | 18.04(2.75)  | 16.43(1.09)  | 0.011*    | 0.75        |
| <b>Trunk-foot vertical acceleration attenuation (m/s<sup>2</sup>)</b> |              |              |           |             |
|                                                                       | 17.00(3.73)  | 28.62(8.61)  | 0.023*    | -1.80       |
| <b>Acceleration Amplitude (m/s<sup>2</sup>)</b>                       |              |              |           |             |
| AP acceleration amplitude of feet                                     | 86.53(14.35) | 94.11(13.45) | 0.13      | 0.53        |
| ML acceleration amplitude of feet                                     | 31.25(7.01)  | 28.37(4.53)  | 0.29      | -0.86       |
| VT acceleration amplitude of feet                                     | 60.11(10.34) | 68.30(9.74)  | 0.007**   | -0.59       |
| AP acceleration amplitude of trunk                                    | 8.97(2.69)   | 7.35(1.69)   | 0.07      | 0.71        |
| ML acceleration amplitude of trunk                                    | 9.11(2.89)   | 8.52(1.28)   | 0.01*     | 0.26        |
| VT acceleration amplitude of trunk                                    | 11.94(3.88)  | 9.65(1.39)   | 0.01*     | 0.76        |
| <b>Local Divergence Exponent (LDE)</b>                                |              |              |           |             |
| AP acceleration of trunk                                              | 1.15(0.46)   | 1.00(0.37)   | 0.28      | 0.35        |
| ML acceleration of trunk                                              | 0.84(0.18)   | 0.68(0.12)   | 0.005**   | 1.01        |
| VT acceleration of trunk                                              | 0.92(0.26)   | 0.87(0.21)   | 0.89      | 0.19        |
| AP angular velocity of trunk                                          | 0.80(0.31)   | 0.69(0.30)   | 0.06      | 0.38        |
| ML angular velocity of trunk                                          | 0.97(0.23)   | 0.69(0.11)   | <0.001*** | 1.48        |
| VT angular velocity of trunk                                          | 0.73(0.32)   | 0.56(0.12)   | 0.048*    | 0.66        |

408

Notes: AP = anteroposterior direction; ML = mediolateral direction; VT = vertical direction.

409

P-values refer to group comparisons based on t-tests, except for measures of the feet, where they

410

refer to the main effect of Group.

411

412

**Table 3.** Variability (and SD) of all gait measures

|  | OF | YF | p-value | Effect Size |
|--|----|----|---------|-------------|
|--|----|----|---------|-------------|

Differences in gait stability and acceleration characteristics between healthy young and older females

| <b>Spatial-temporal Gait Measures</b>                                 |            |            |          |       |
|-----------------------------------------------------------------------|------------|------------|----------|-------|
| Stride time (s)                                                       | 0.02(0.01) | 0.02(0.01) | 0.64     | -0.23 |
| Initial double support period, IDS (%)                                | 0.74(0.11) | 0.71(0.11) | 0.48     | 0.35  |
| Terminal double support period, TDS (%)                               | 0.80(0.20) | 0.79(0.15) | 0.93     | 0.17  |
| Swing (%)                                                             | 0.75(0.16) | 0.75(0.19) | 0.97     | 0.10  |
| Velocity of feet (m/s)                                                | 0.06(0.03) | 0.08(0.04) | 0.05     | -0.72 |
| Stride length of feet (m)                                             | 0.02(0.01) | 0.05(0.05) | 0.13     | -0.38 |
| <b>VT Acceleration Maximum (m/s<sup>2</sup>)</b>                      |            |            |          |       |
| VT maximum acceleration of feet                                       | 4.05(1.39) | 7.90(3.26) | <0.001** | -1.70 |
| VT maximum acceleration of trunk                                      | 1.02(0.44) | 0.78(0.13) | 0.007**  | 0.72  |
| <b>Trunk-foot vertical acceleration attenuation (m/s<sup>2</sup>)</b> |            |            |          |       |
|                                                                       | 4.02(1.09) | 7.99(2.91) | 0.008**  | -1.87 |
| <b>Acceleration Amplitude (m/s<sup>2</sup>)</b>                       |            |            |          |       |
| AP acceleration amplitude of feet                                     | 5.97(1.77) | 7.52(1.91) | 0.026*   | -0.85 |
| ML acceleration amplitude of feet                                     | 4.64(1.20) | 5.84(1.88) | 0.045*   | -2.53 |
| VT acceleration amplitude of feet                                     | 4.92(1.38) | 9.69(2.72) | <0.001** | -1.01 |
| AP acceleration amplitude of trunk                                    | 1.26(0.45) | 1.05(0.31) | 0.350    | 0.53  |
| ML acceleration amplitude of trunk                                    | 0.98(0.48) | 0.82(0.21) | 0.017*   | 0.41  |
| VT acceleration amplitude of trunk                                    | 1.31(0.67) | 0.08(0.15) | <0.001** | 0.86  |

413 Notes: AP = anteroposterior direction; ML = mediolateral direction; VT = vertical direction.

414 P-values refer to group comparisons based on t-tests, except for measures of the feet, where they  
 415 refer to the main effect of Group.

416
