# Supplementary material for: Differences in gait stability and acceleration characteristics between healthy young and older females
Source: bioRxiv or medRxiv preprint supplement (doi:10.1101/2021.02.24.432667), 2021-10-11
Supplement: Supplementary file [file media-1.pdf]

## Supplementary material

These supplementary materials show the average embedding dimension and delay time of LDE.

**Table 1.** Average (SD) of embedding dimension

| Time series                  | OF          | YF          |
|------------------------------|-------------|-------------|
| AP acceleration of trunk     | 12.10(5.88) | 11.88(4.97) |
| ML acceleration of trunk     | 19.70(7.05) | 19.71(7.02) |
| VT acceleration of trunk     | 24.75(7.57) | 26.29(7.97) |
| AP angular velocity of trunk | 11.10(3.46) | 10.47(3.78) |
| ML angular velocity of trunk | 14.35(6.98) | 15.00(3.48) |
| VT angular velocity of trunk | 9.45(3.17)  | 12.06(2.61) |

**Table 2.** Average (SD) of delay time

| Time series                  | OF         | YF         |
|------------------------------|------------|------------|
| AP acceleration of trunk     | 5.95(0.94) | 4.76(1.30) |
| ML acceleration of trunk     | 4.60(1.23) | 6.41(1.87) |
| VT acceleration of trunk     | 4.20(2.17) | 3.76(1.75) |
| AP angular velocity of trunk | 7.05(1.82) | 8.24(2.41) |
| ML angular velocity of trunk | 5.90(1.48) | 6.18(1.42) |
| VT angular velocity of trunk | 9.90(3.54) | 8.53(1.91) |
